# Supplementary material for: Genetically-programmed, mesenchymal stromal cell-laden & mechanically strong 3D bioprinted scaffolds for bone repair
Source: PubMed Central journal article supplement (PMC7445425; doi:10.1016/j.jconrel.2020.06.035), 2020-09-10
Supplement: mmc3.pdf [file mmc3.pdf]

Figure S1.

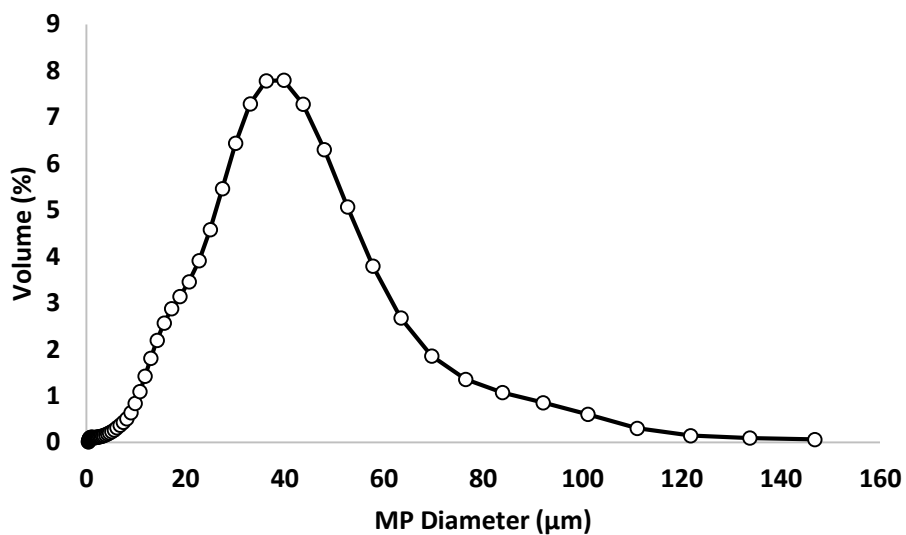

**Figure S1. Size distribution of GET-RUNX2 PLGA MPs.** Representative size distribution of GET-RUNX2-loaded PLGA MPs generated with 0.1% (w/w) PBS, 25% (w/w) L-Histidine.

Figure S2.

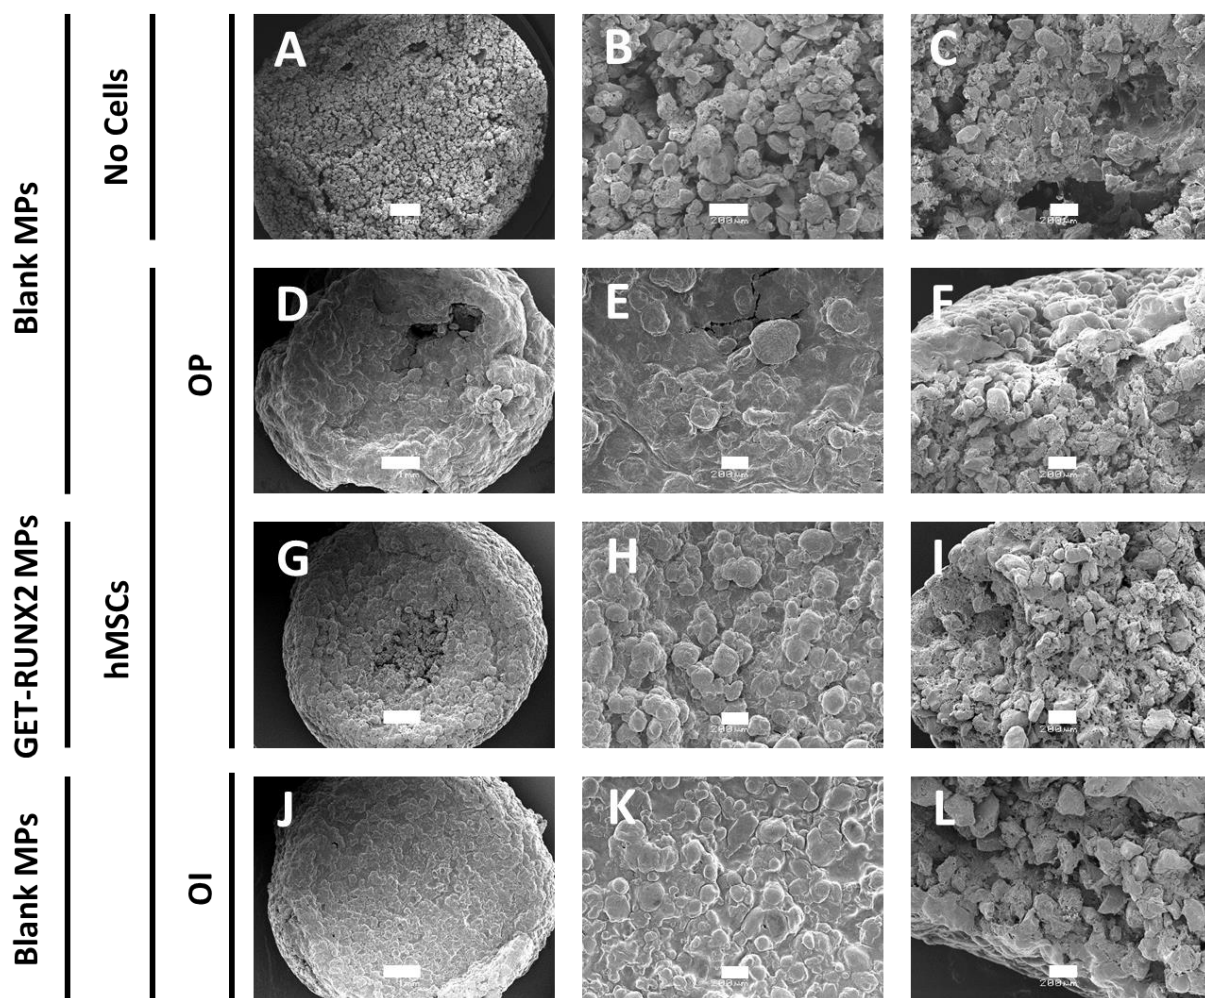

**Figure S2. Morphology of PLGA/PEG scaffolds after prolonged hMSC culture using SEM.** SEM images of scaffolds with and without hMSCs cultured in growth media for 21 days. No cells represents scaffold prepared from blank MPs without cells kept in osteo-permissive (OP) media. Blank MPs represents cell-seeded scaffold containing blank MPs cultured in osteo-permissive (OP) media. RUNX2-loaded MPs represents cell-seeded scaffolds containing P21-RUNX2-8R loaded MPs cultured in osteo-permissive (OP) media. OI media represents cell seeded scaffolds containing blank MPs cultured in osteo-inductive (OI) media. C, F, I and L are for scaffolds cut in half to show internal morphology. Scale bars for A, D, G, J are 1mm; B, E, H, K are 200µm; and C, F, I, L are 200µm, respectively.

Figure S3.

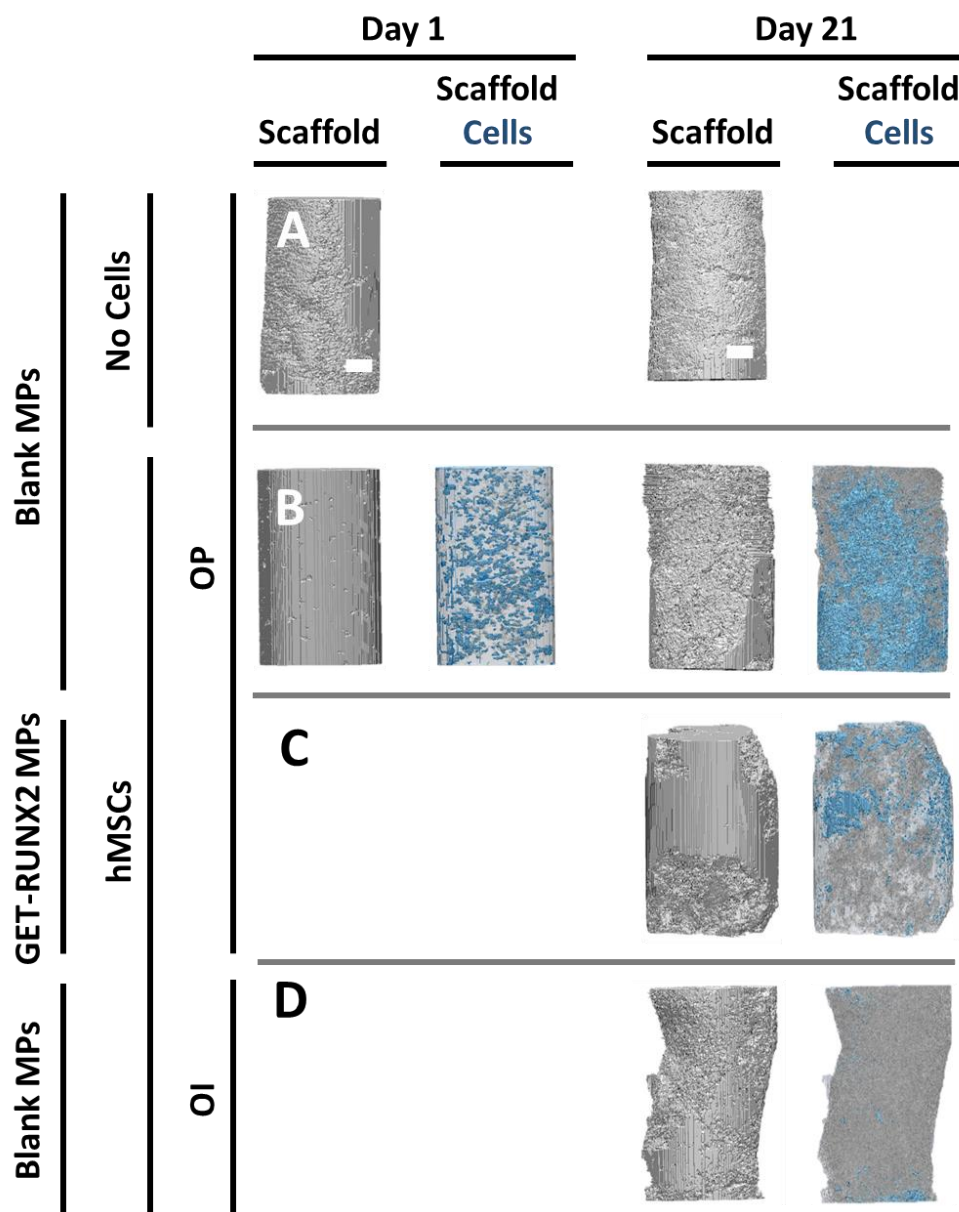

**Figure S3. Microstructural analysis of PLGA/PEG scaffolds.** Micro( $\mu$ )CT imaging for scaffolds cultured in different conditions. Scaffolds were treated with osmium tetroxide prior to scan. (A) Non-seeded scaffold prepared from blank MPs placed in cell culture media at day 1 and day 21. (B) Cell seeded scaffold prepared from blank MPs cultured in osteo-permissive media for 21 days (left image) and merged cells and scaffold showing cell distribution (right). (C) hMSC seeded scaffold prepared from P21-RUNX2-8R loaded MPs cultured in osteo-permissive media (OP) for 21 days (left image) and merged cells and scaffold showing cell distribution (right). (D) hMSC seeded scaffold prepared with blank MPs cultured in osteo-inductive (OI) media for 21 days (left image) and merged cells and scaffold showing cell distribution (right). Cell-seeded scaffold at day 1 in all conditions are shown, scaffold (left image) and merged cells and scaffold showing cell distribution (right). Grey is scaffold; blue is osmium-stained cells. Scale bar is 1mm.

Figure S4.

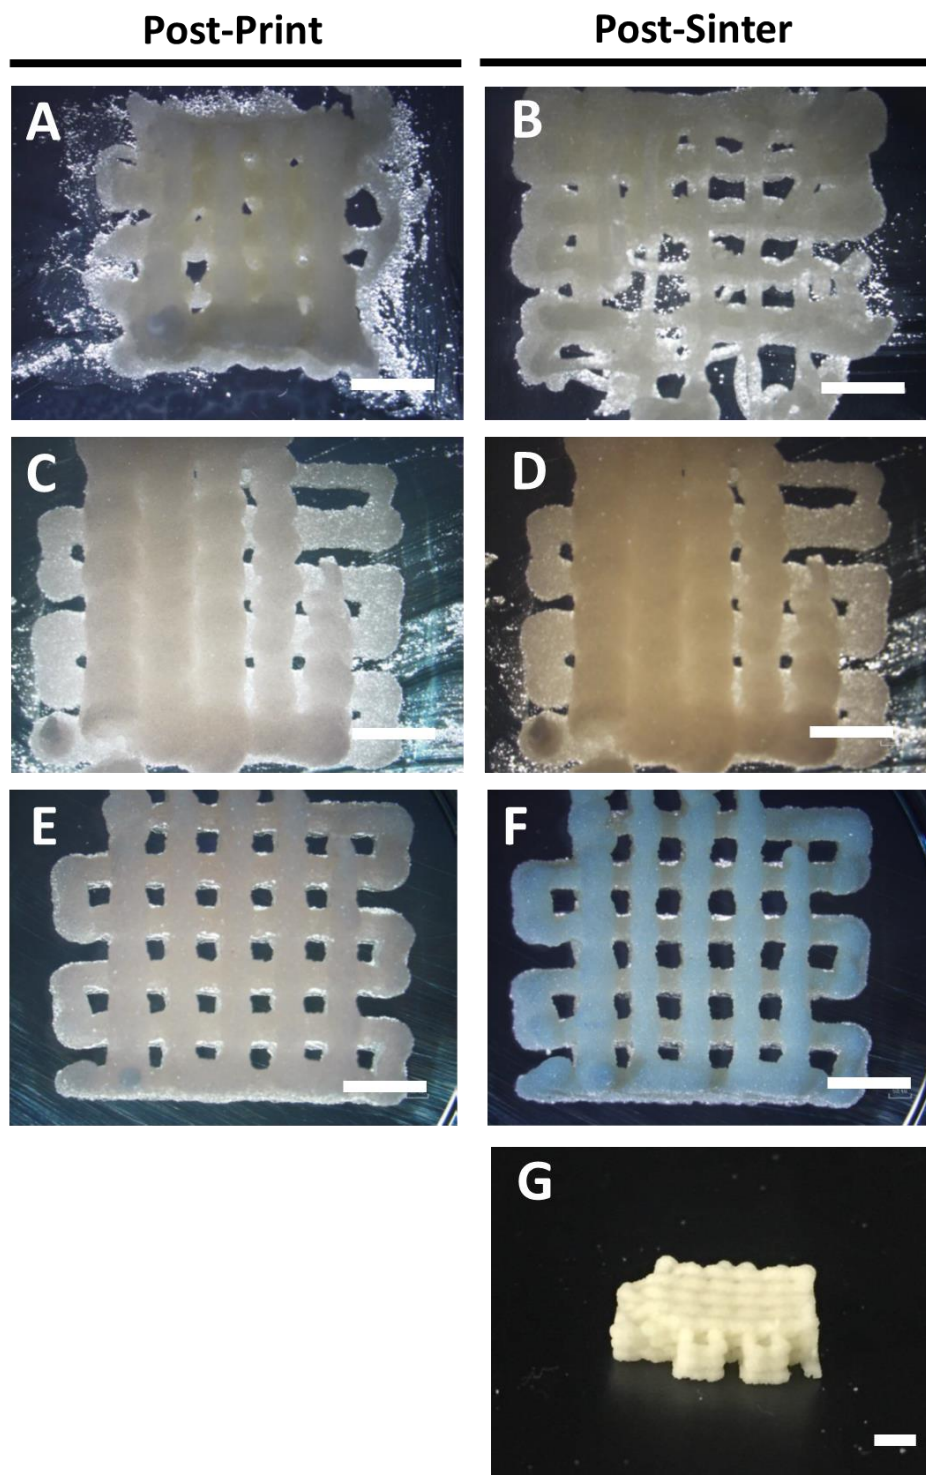

**Figure S4. PLGA/PEG pastes can be 3D printed with addition of Pluronic F127.** Various ratios and concentrations of Pluronic F127 (PF127) were utilized to 3D print PLGA/PEG particles. Dissection microscope images (A, B) Post-print and post-sinter of PLGA/PEG: PF127 15% (1:1.2 ratio). (C, D) Post-print and post-sinter of PLGA/PEG: PF127 15% (1:1.3 ratio). (E-G) Post-print and post-sinter of PLGA/PEG: PF127 18% (1:1.5 ratio). (G) Shows multi-layered sintered scaffold. Sintering was for 2 hours at 37°C. Scale bars represents 1mm.

Figure S5.

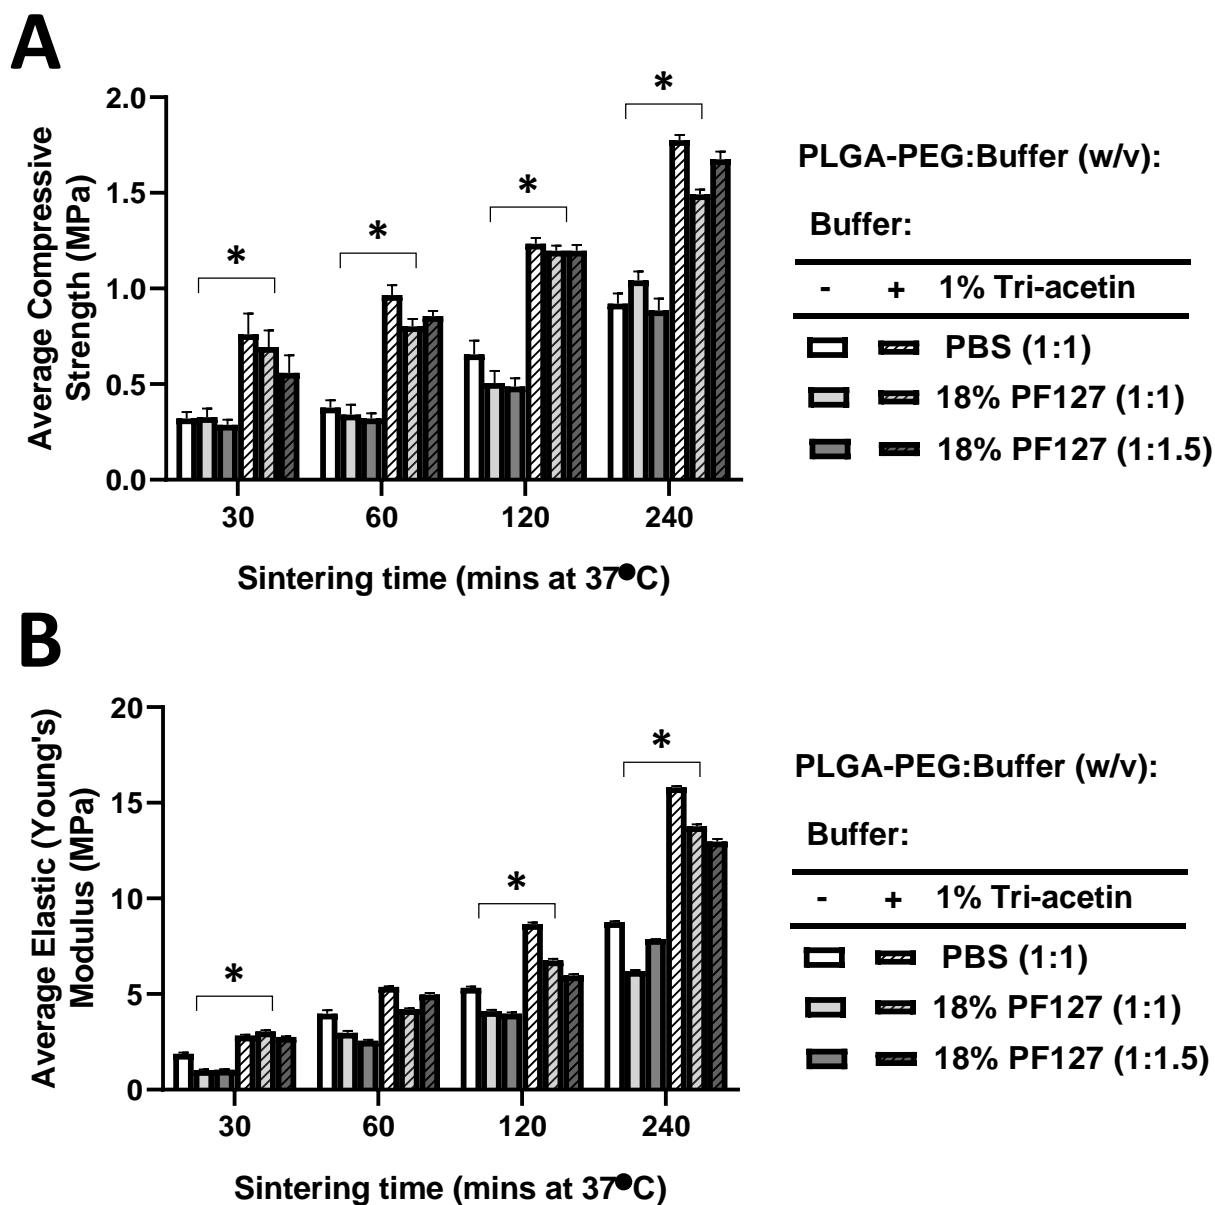

**Figure S5. Enhanced sintering and mechanical properties of PLGA/PEG scaffolds with Tri-acetin.** (A) Compressive strength (MPa), and (B) Elastic (Young's) modulus (MPa) of PLGA-PEG:PBS (1:1) or PLGA-PEG:18% PF127 scaffolds (1:1 or 1:1.5) with and without 1% (v/v) Tri-acetin (w/v) sintered for 30 to 240 min at 37°C. Scaffolds were tested directly after sintering. Error bars indicate SD; n=6. \* p<0.05 comparing with and without Tri-acetin.

Figure S6.

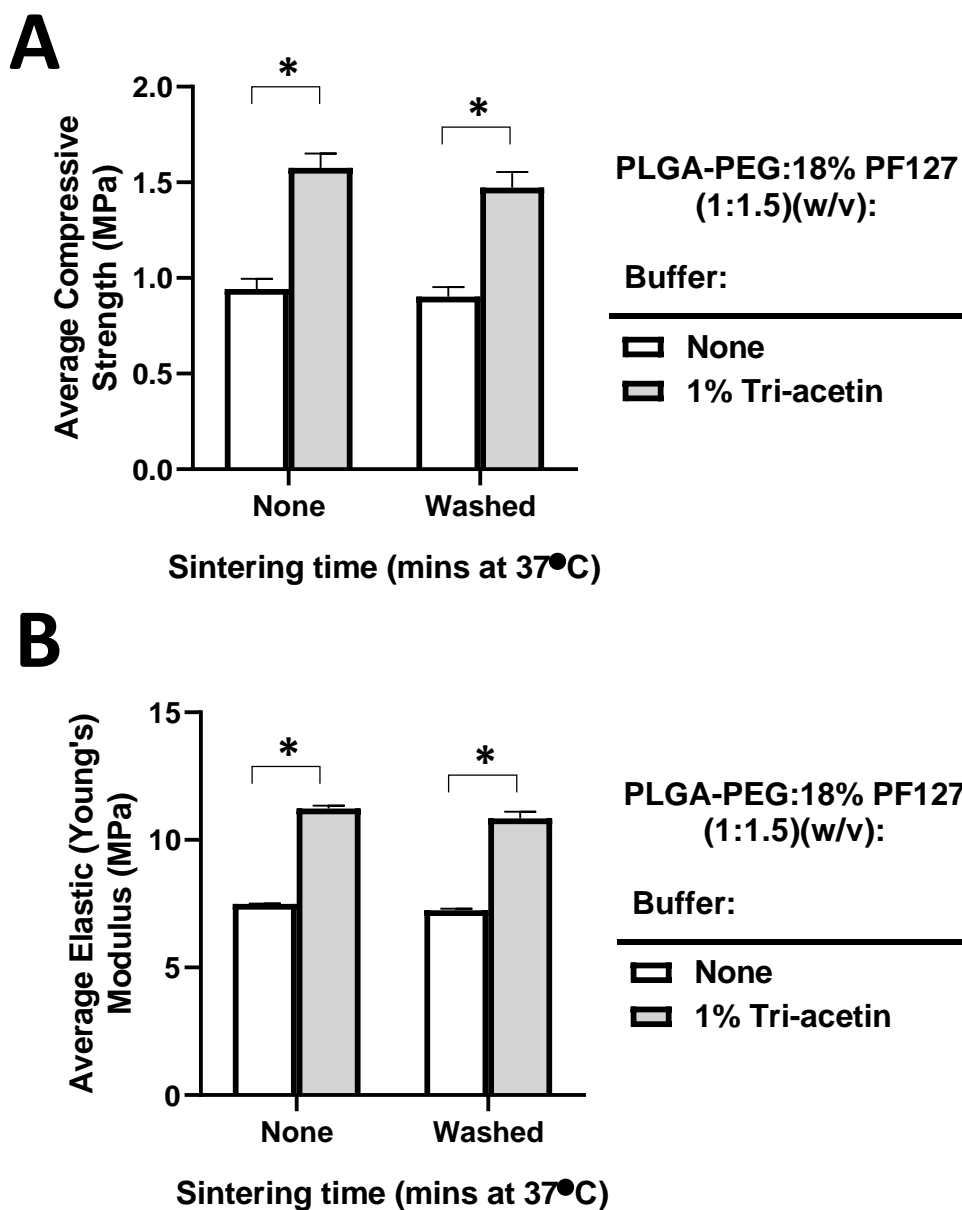

**Figure S6. Cold washing does not affect mechanical properties of PLGA/PEG scaffolds.** (A) Compressive strength (MPa), and (B) Elastic (Young's) modulus (MPa) of PLGA-PEG: 18% PF127 scaffolds with and without 1% (v/v) Tri-acetin (1:1.5) (w/v) sintered for 240 min at 37°C. Scaffolds were tested after sintering or cold PBS washed at 4°C for 45mins before testing. Error bars indicate SD; n=6. \* p<0.05.

Figure S7.

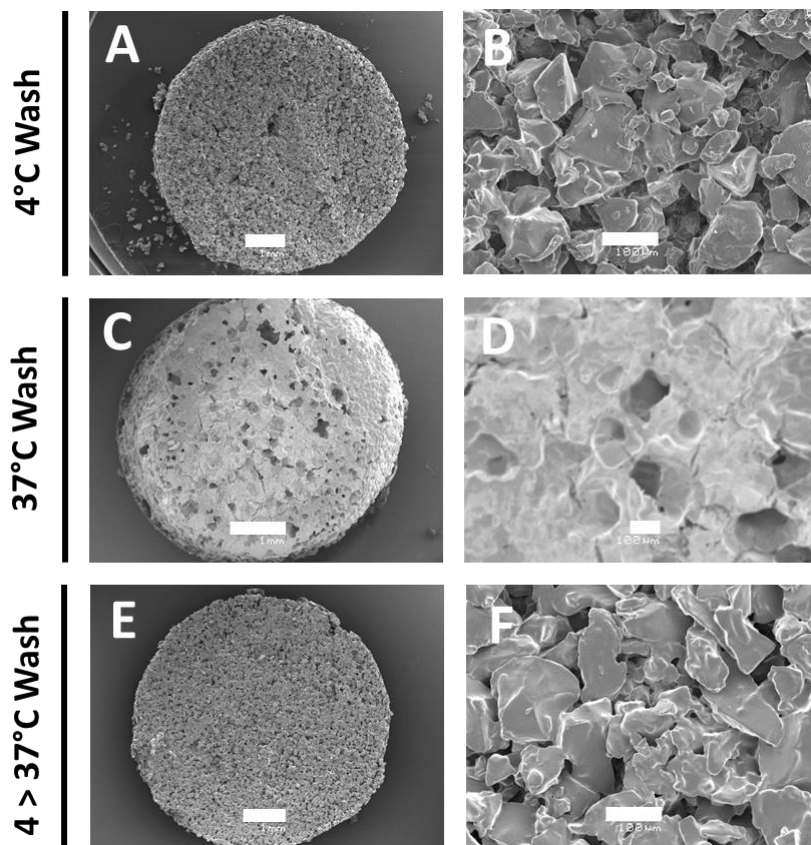

**Figure S7. Cold washing removes PF127 from PLGA/PEG scaffolds.** SEM analysis of scaffold morphology. PLGA/PEG mixed with 1% Tri-actin and 18% PF127 (1:1.5 ratio) scaffolds were sintered at 37°C. Scaffolds were then washed with PBS at 4°C (A,B), 37°C (C,D) or 4°C then at 37°C (E,F) for 45mins. Scale bars for A, C, E and B, D, F are 1mm and 100µm, respectively.

Figure S8.

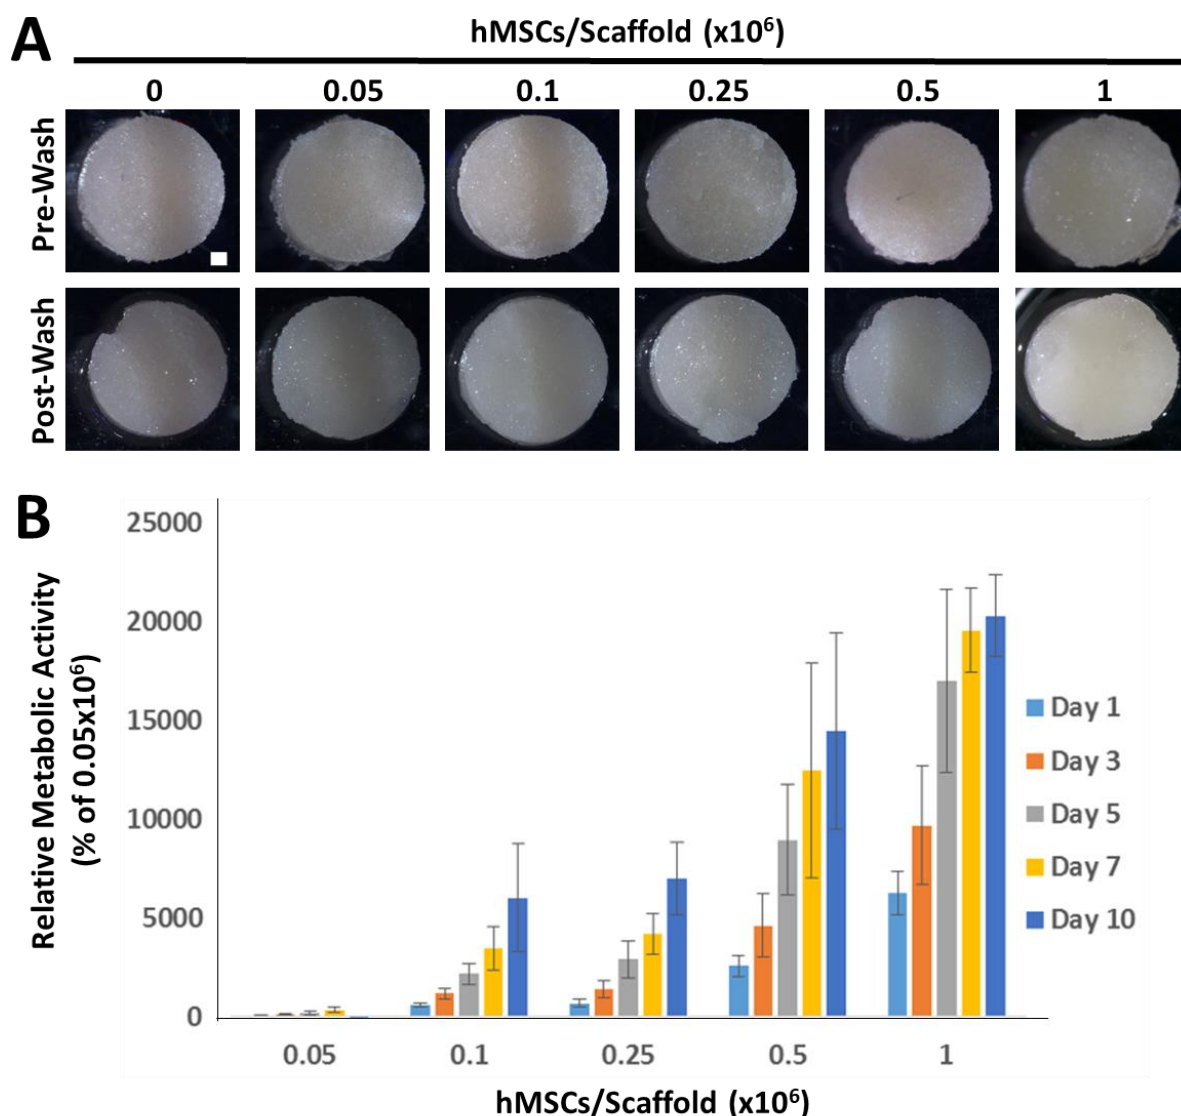

**Figure S8. Scaffold integrity and hMSC proliferation after removal of PF127.** Various densities of cells ( $0-1 \times 10^6$  ihMSCs/ml) were mixed with 1% Tri-acetin, 18% PF127 (w/v) solution and added to PLGA/PEG forming a paste at room temperature. The paste was then loaded into Teflon mould to produce cylindrical scaffolds (6mm X 3mm). The scaffolds were then sintered at  $37^\circ\text{C}$  for 2 hours. The scaffolds were then washed in PBS at  $4^\circ\text{C}$  for 45 minutes, transferred to 24 well plate and immersed in 1 ml media before culturing at  $37^\circ\text{C}$  for the entire study. (A) Microscope images for scaffolds after sintering and after washing showing intact scaffolds formulated with different cell numbers. Scale bar is  $500\mu\text{m}$ . (B) PrestoBlue cell assay at different time points assessing cell retention, viability and proliferation in the cultured scaffolds. Error bars indicate SD ( $n = 3$ ). Data is presented as a % of the  $0.05 \times 10^6$  hMSC/ml sample at day 1.



Figure S9.

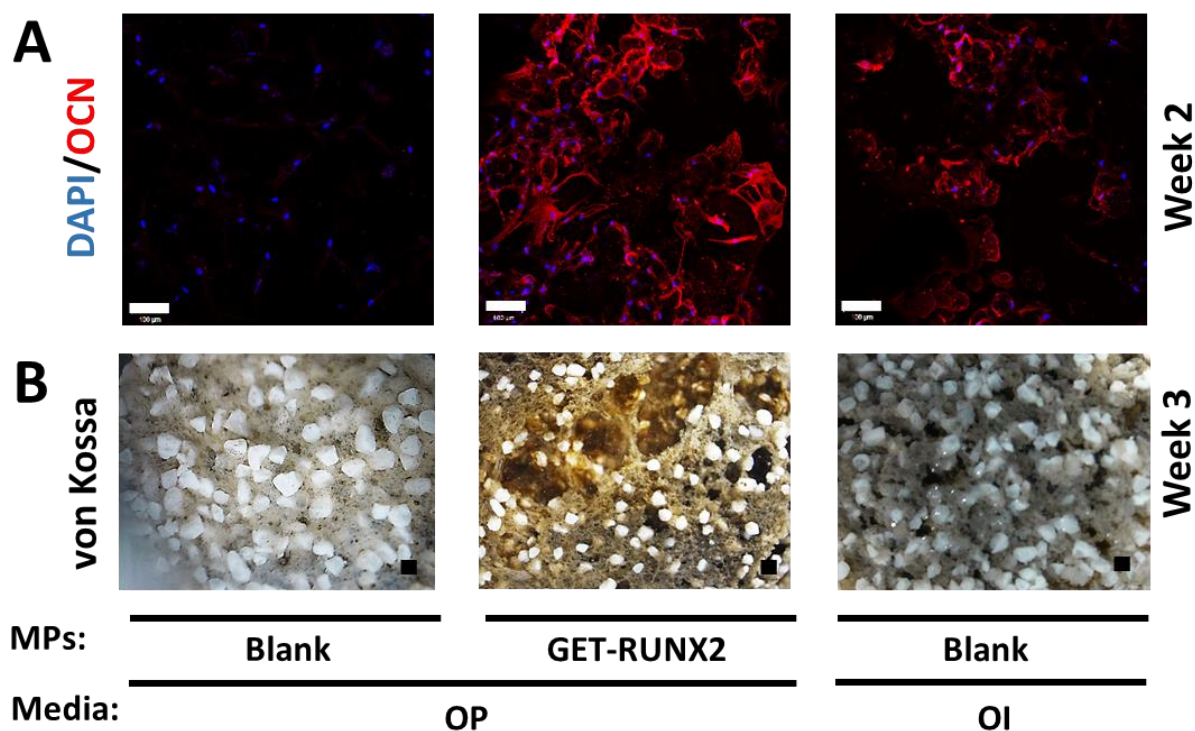

**Figure S9. hMSC osteogenic differentiation in 3D bioprinted PLGA/PEG scaffolds.** Differentiation markers for hMSCs 3D bioprinted within scaffolds in osteo-permissive (OP) and osteo-inductive media (OI). Scaffolds were prepared by mixing PLGA/PEG particles with blank or GET-RUNX2 loaded MPs, and 1% Tri-acetin, 18% PF127 in 1:1.5 ratio (total particles : PF127). (A) OSTEOCALCIN (OCN) immunostaining (red) with DAPI (blue) at week 2 (scale bar 100  $\mu$ m). (B) Von kossa-stained samples at week 3 (scale bar 100  $\mu$ m). Blank MPs represents cell seeded scaffold containing blank MPs cultured in osteo-permissive (OP) media. Loaded MPs represents cell-seeded scaffolds containing P21-RUNX2-8R-loaded MPs cultured in osteo-permissive (OP) media. OI media represents cell seeded scaffolds containing blank MPs cultured in osteo-inductive media (OI).

Figure S10.

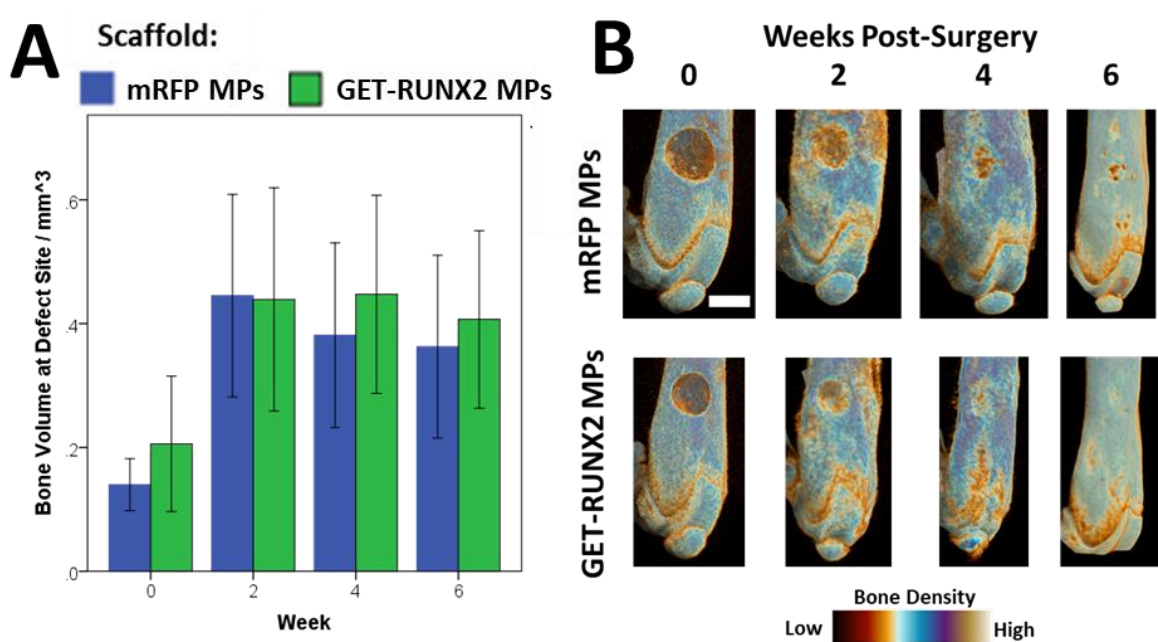

**Figure S10. Similar bone volume at defect site using PLGA/PEG scaffolds with control (mRFP) or GET-RUNX2 MPs.** (A) Total volume of bone detected at the defect site over a 6 week time period in mice implanted with  $1-3 \times 10^4$  hMSCs on a  $1 \text{ mm}^3$  scaffold containing either GET-mRFP MPs (control) or GET-RUNX2 MPs. (B) Representative false colour CT images showing drill defect area. Time indicates the number of weeks after surgery.  $n=9-12$  per group. Graphs show mean with 95% confidence limits.
